# Supplementary material for: Different Infectivity of HIV-1 Strains Is Linked to Number of Envelope Trimers Required for Entry
Source: PubMed Central journal article supplement (PMC4287578; doi:10.1371/journal.ppat.1004595), 2015-01-08

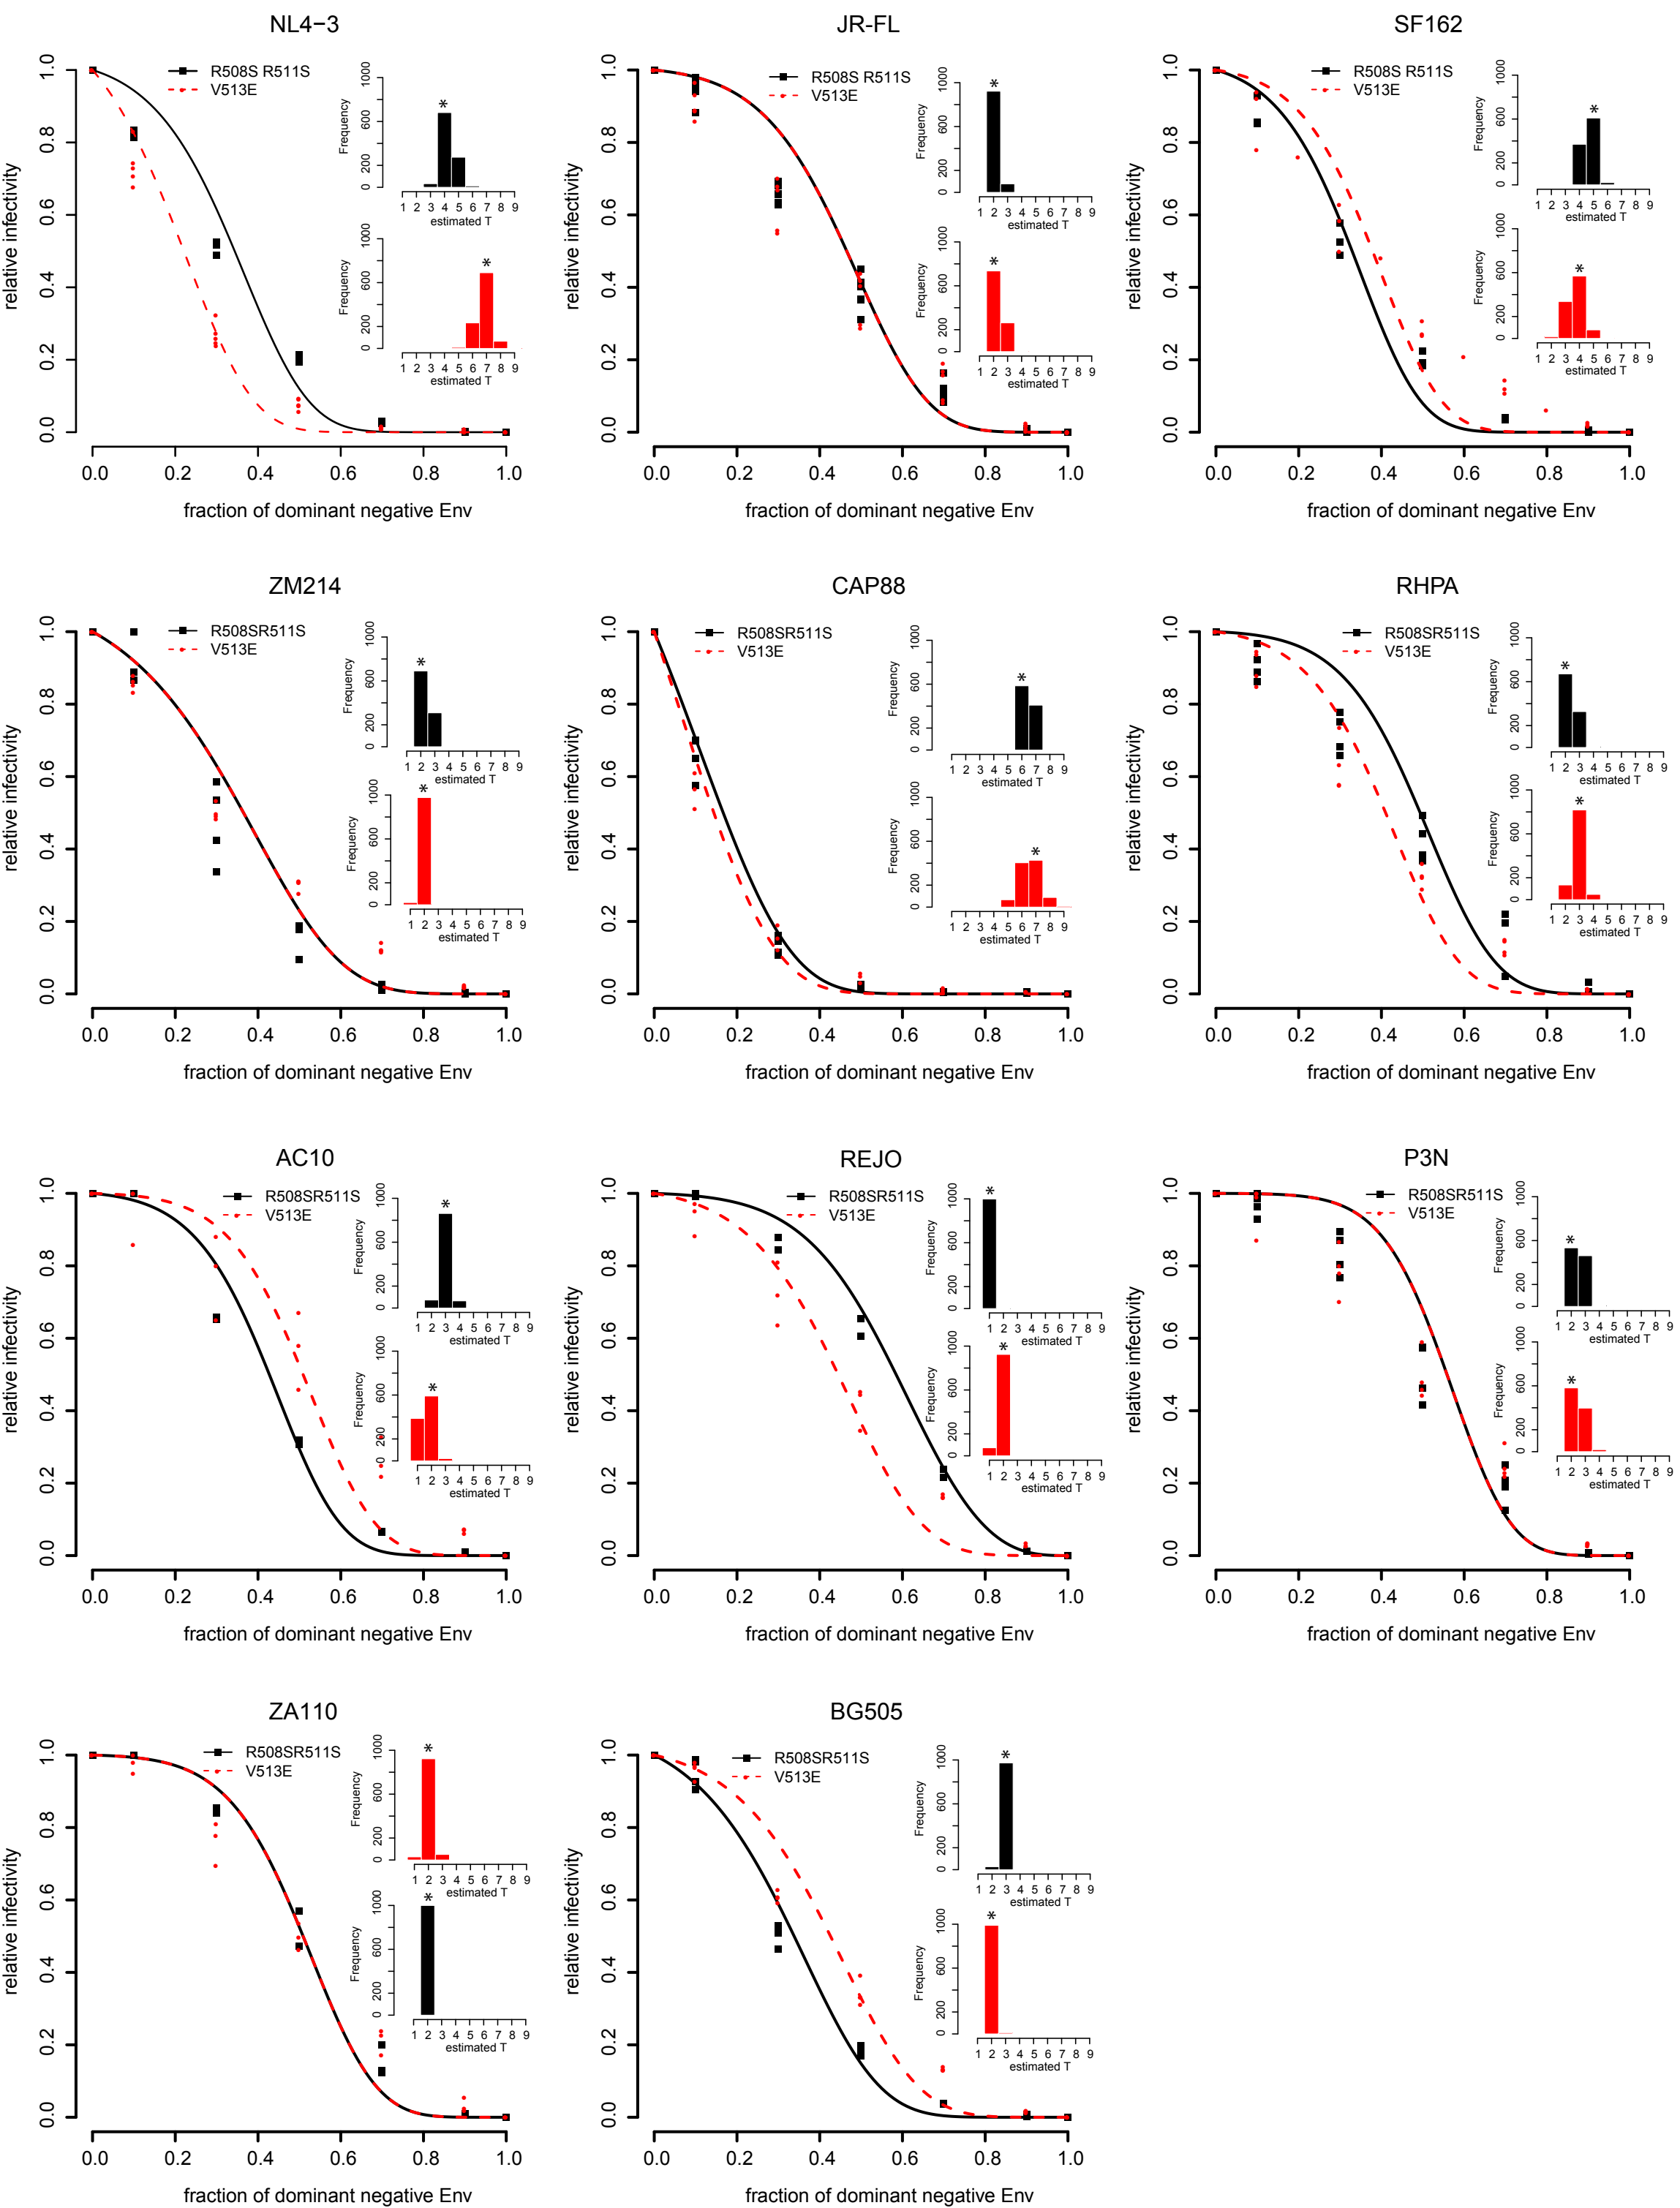

Supplement: ppat.1004595.s001.pdf [file ppat.1004595.s001.pdf]
