# Supplementary material for: Different Infectivity of HIV-1 Strains Is Linked to Number of Envelope Trimers Required for Entry
Source: PubMed Central journal article supplement (PMC4287578; doi:10.1371/journal.ppat.1004595), 2015-01-08

A

Basic model fits

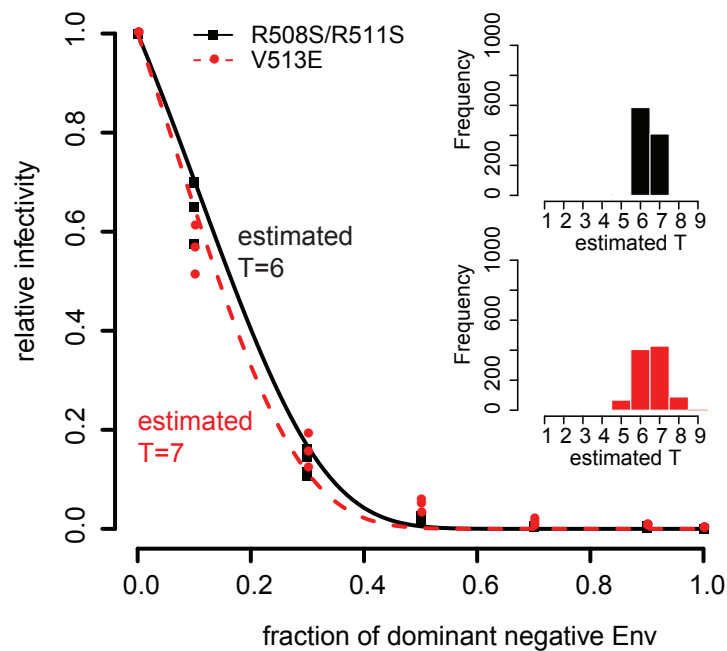

B

Imperfect transfection model fits

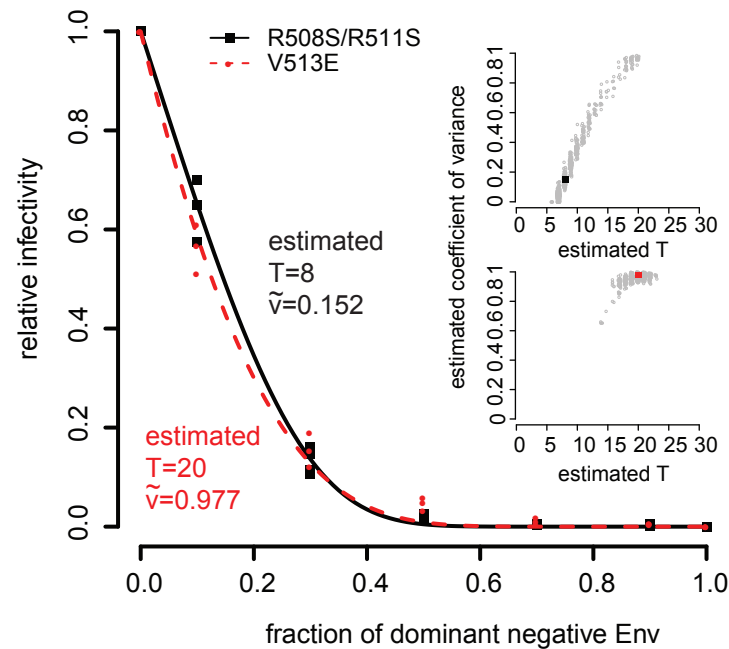

C

Segregation model fits

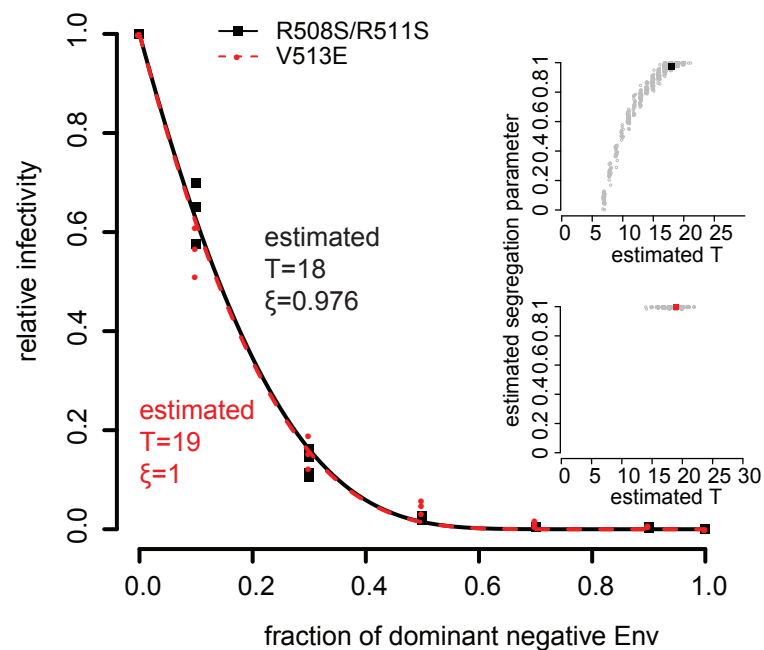

D

Incremental/soft threshold model fits

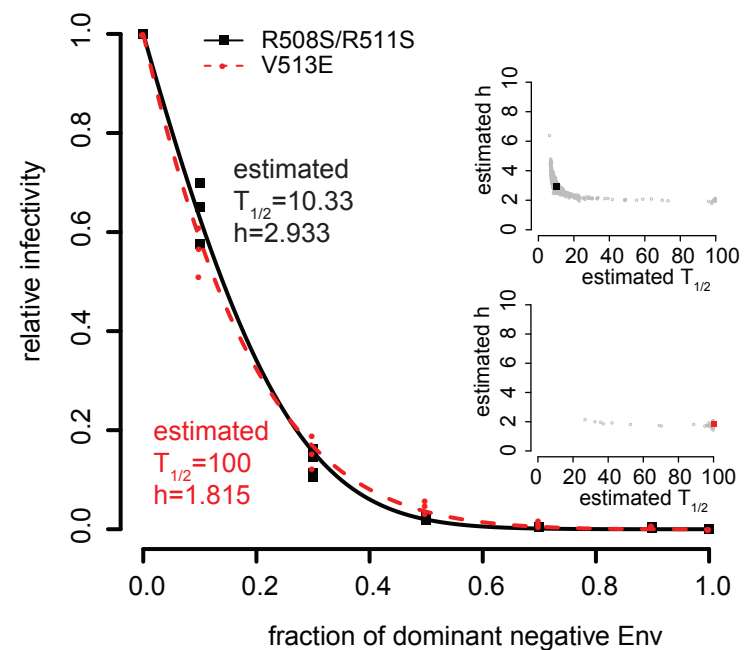

Supplement: ppat.1004595.s002.pdf [file ppat.1004595.s002.pdf]
