# Supplementary material for: Different Infectivity of HIV-1 Strains Is Linked to Number of Envelope Trimers Required for Entry
Source: PubMed Central journal article supplement (PMC4287578; doi:10.1371/journal.ppat.1004595), 2015-01-08

# Supplementary Figure S6

## A

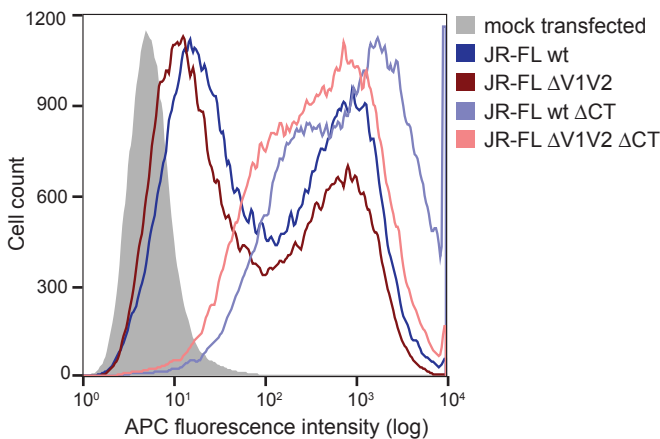

## B

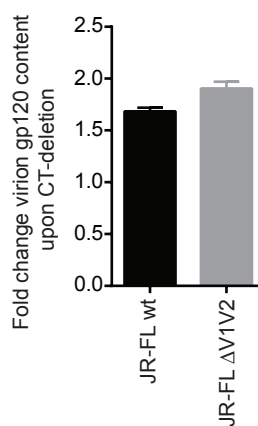

## C

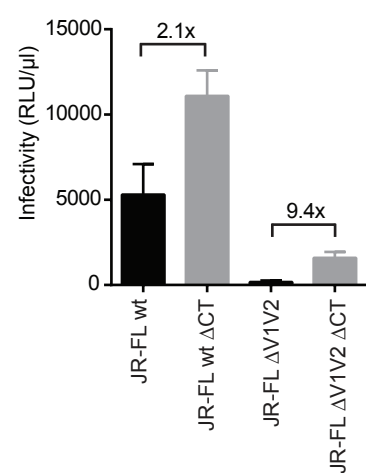

## D

wt virion population (low T)

— wt virion population  
 — wt  $\Delta CT$  virion population

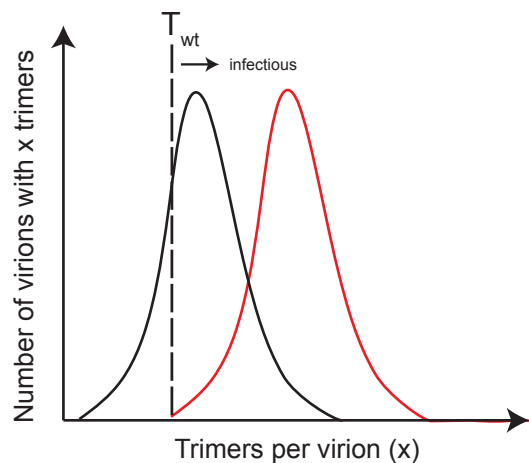

## E

$\Delta V1V2$  virion population (high T)

—  $\Delta V1V2$  virion population  
 —  $\Delta V1V2 \Delta CT$  virion population

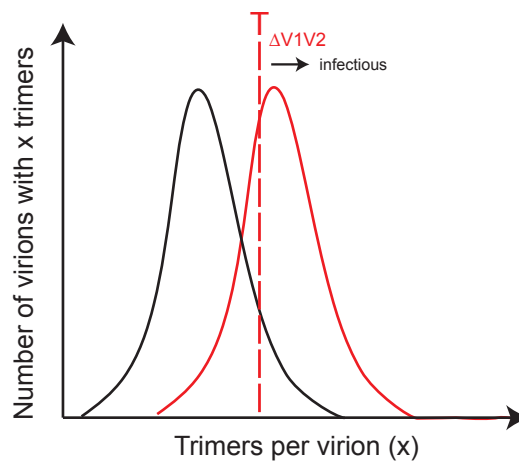

Supplement: ppat.1004595.s006.pdf [file ppat.1004595.s006.pdf]
