# Supplementary material for: Different Infectivity of HIV-1 Strains Is Linked to Number of Envelope Trimers Required for Entry
Source: PubMed Central journal article supplement (PMC4287578; doi:10.1371/journal.ppat.1004595), 2015-01-08

## Supplementary Figure S10

**Virion 1:** Stoichiometry of entry (T) = 2  
1 antibody required to neutralize each trimer  
13 trimer per virion

Minimum number  
of antibodies  
for neutralization:

$$Ab_{(min)} = 12$$

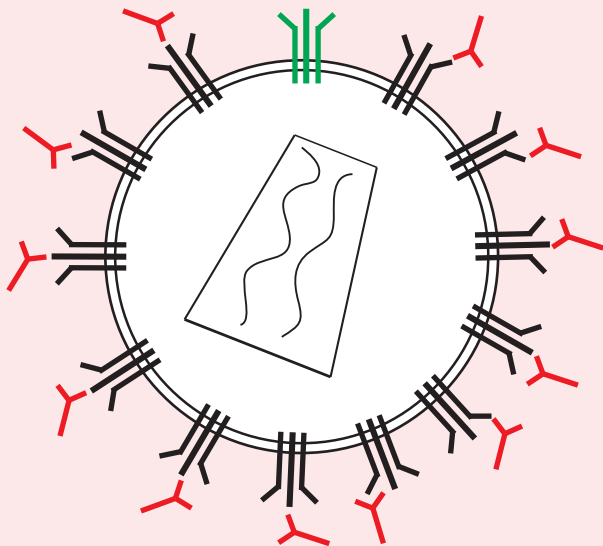

**Virion 2:** Stoichiometry of entry (T) = 7  
1 antibody required to neutralize each trimer  
13 trimer per virion

Minimum number  
of antibodies  
for neutralization:

$$Ab_{(min)} = 7$$

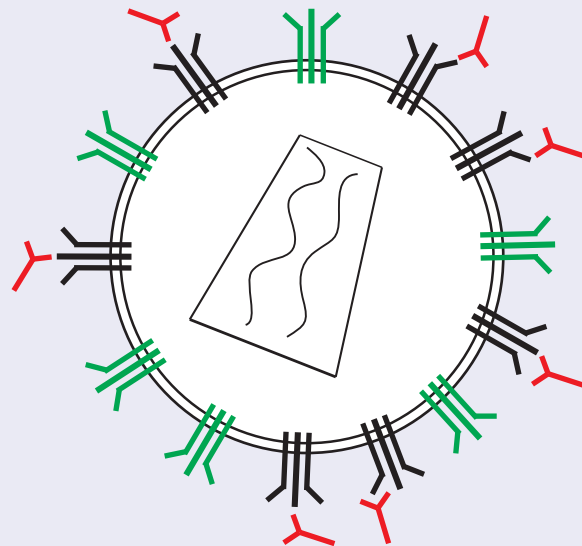

Supplement: ppat.1004595.s010.pdf [file ppat.1004595.s010.pdf]
