# Supplementary material for: Different Infectivity of HIV-1 Strains Is Linked to Number of Envelope Trimers Required for Entry
Source: PubMed Central journal article supplement (PMC4287578; doi:10.1371/journal.ppat.1004595), 2015-01-08
Supplement: ppat.1004595.s011.pdf [file ppat.1004595.s011.pdf]

# Supplementary Figure S11

## Theoretical considerations of membrane fusion energies

---

Energy required for membrane fusion: 40 to 120  $k_bT$

Energy released by Influenza HA trimer refolding: 30 to 60  $k_bT$

Energy released by SNARE complex refolding: 20 to 65  $k_bT$

---

Number of HA trimers estimated to partake in membrane fusion: 3 to 4  
> total energy released 90 to 240  $k_bT$

Number of SNAREs estimated to partake in membrane fusion: 1 to 3  
> total energy released 20 to 195  $k_bT$

---

Number of env trimers estimated to partake in membrane fusion: 2 to 7

Assuming that the energy required for membrane fusion is 40 to 120  $k_bT$   
it follows that each HIV env trimer releases

> 20 to 60  $k_bT$  if  $T=2$

> 6 to 17  $k_bT$  if  $T=7$
