# Supplementary material for: Different Infectivity of HIV-1 Strains Is Linked to Number of Envelope Trimers Required for Entry
Source: PubMed Central journal article supplement (PMC4287578; doi:10.1371/journal.ppat.1004595), 2015-01-08
Supplement: ppat.1004595.s012.pdf [file ppat.1004595.s012.pdf]

**Supplementary Table S1**

| Strain | Mutation   | Basic model | Imperfect transfection model |                                    |                                               | Segregation model |                                 |                                               | Soft threshold model       |             |                                               |
|--------|------------|-------------|------------------------------|------------------------------------|-----------------------------------------------|-------------------|---------------------------------|-----------------------------------------------|----------------------------|-------------|-----------------------------------------------|
|        |            | estimated T | estimated T                  | estimated coefficient of variation | p value of comparison to basic model (F-test) | estimated T       | estimated segregation parameter | p value of comparison to basic model (F-test) | estimated T <sub>1/2</sub> | estimated h | p value of comparison to basic model (F-test) |
| NL4-3  | R508SR511S | 4           | 12                           | 0.952                              | <0.0005                                       | 12                | 0.984                           | <0.0005                                       | 7.986                      | 1.328       | <0.0005                                       |
| NL4-3  | V513E      | 7           | 18                           | 0.977                              | <0.0005                                       | 18                | 1                               | <0.0005                                       | 20.108                     | 1.596       | <0.0005                                       |
| JR-FL  | R508SR511S | 2           | 8                            | 0.98                               | <0.0005                                       | 8                 | 1                               | <0.0005                                       | 2.134                      | 1.232       | <0.0005                                       |
| JR-FL  | V513E      | 2           | 8                            | 0.953                              | <0.0005                                       | 8                 | 1                               | <0.0005                                       | 79.074                     | 0.463       | <0.0005                                       |
| SF162  | R508SR511S | 5           | 12                           | 0.859                              | <0.0005                                       | 13                | 0.993                           | <0.0005                                       | 5.834                      | 1.643       | <0.0005                                       |
| SF162  | V513E      | 4           | 12                           | 1                                  | <0.0005                                       | 11                | 1                               | <0.0005                                       | 100                        | 0.576       | <0.0005                                       |
| ZM214  | R508SR511S | 2           | 3                            | 0.084                              | <0.0005                                       | 3                 | 0.235                           | 0.094                                         | 1.956                      | 7.578       | 0.042                                         |
| ZM214  | V513E      | 2           | 7                            | 0.951                              | <0.0005                                       | 7                 | 1                               | <0.0005                                       | 100                        | 0.525       | <0.0005                                       |
| CAP88  | R508SR511S | 6           | 8                            | 0.152                              | <0.0005                                       | 18                | 0.976                           | 0.001                                         | 10.329                     | 2.933       | <0.0005                                       |
| CAP88  | V513E      | 7           | 20                           | 0.977                              | <0.0005                                       | 19                | 1                               | <0.0005                                       | 100                        | 1.815       | <0.0005                                       |
| RHPA   | R508SR511S | 2           | 8                            | 0.93                               | <0.0005                                       | 8                 | 0.972                           | <0.0005                                       | 4.17                       | 0.718       | <0.0005                                       |
| RHPA   | V513E      | 3           | 10                           | 1                                  | <0.0005                                       | 9                 | 0.99                            | <0.0005                                       | 12.209                     | 0.668       | <0.0005                                       |
| AC10   | R508SR511S | 3           | 7                            | 0.568                              | <0.0005                                       | 5                 | 0.509                           | 0.412                                         | 2.454                      | 2.94        | 0.038                                         |
| AC10   | V513E      | 2           | 7                            | 0.979                              | <0.0005                                       | 7                 | 1                               | <0.0005                                       | 3.223                      | 0.329       | <0.0005                                       |
| REJO   | R508SR511S | 1           | 2                            | 0.262                              | <0.0005                                       | 2                 | 0.464                           | 0.055                                         | 94.882                     | 0.061       | 0.044                                         |
| REJO   | V513E      | 2           | 6                            | 0.872                              | <0.0005                                       | 6                 | 0.966                           | <0.0005                                       | 3.541                      | 0.519       | <0.0005                                       |
| P3N    | R508SR511S | 2           | 10                           | 0.986                              | <0.0005                                       | 10                | 1                               | <0.0005                                       | 1.867                      | 1.283       | <0.0005                                       |
| P3N    | V513E      | 2           | 10                           | 0.998                              | <0.0005                                       | 10                | 1                               | <0.0005                                       | 1.954                      | 0.825       | <0.0005                                       |
| ZA110  | R508SR511S | 2           | 4                            | 0.378                              | <0.0005                                       | 4                 | 0.598                           | 0.081                                         | 1.364                      | 2.932       | <0.0005                                       |
| ZA110  | V513E      | 2           | 8                            | 1                                  | <0.0005                                       | 7                 | 0.969                           | <0.0005                                       | 1.357                      | 0.872       | <0.0005                                       |
| BG505  | R508SR511S | 3           | 4                            | 0.165                              | <0.0005                                       | 5                 | 0.567                           | 0.111                                         | 2.593                      | 2.89        | 0.001                                         |
| BG505  | V513E      | 2           | 7                            | 0.933                              | <0.0005                                       | 7                 | 1                               | <0.0005                                       | 1.878                      | 1.132       | <0.0005                                       |
